# Supplementary material
Source: HighWire-hosted journal article supplement (https://bmjopen.bmj.com/content/6/3/e010989)
Supplement: inline-supplementary-material-3 [file inline-supplementary-material-3.pdf]

## Appendix 3

### Critical appraisal checklist of articles

Reviewer ..... Manuscript Code .....  
 Author ..... Date of Review .....  
 Journal ..... Date of Publication .....

#### 1. Screening question

|                                                            | Yes                      | NC*                      | No                       | NA**                     |
|------------------------------------------------------------|--------------------------|--------------------------|--------------------------|--------------------------|
| 1.1 Does the article contain a definition of polypharmacy? | <input type="checkbox"/> | <input type="checkbox"/> | <input type="checkbox"/> | <input type="checkbox"/> |
| Is it worth continuing?                                    | <input type="checkbox"/> |                          | <input type="checkbox"/> |                          |

#### 2. Detailed questions

|                                                                                                   | Yes                      | NC                       | No                       | NA                       |
|---------------------------------------------------------------------------------------------------|--------------------------|--------------------------|--------------------------|--------------------------|
| 1.2 Is the criterion for defining polypharmacy clearly stated?                                    | <input type="checkbox"/> | <input type="checkbox"/> | <input type="checkbox"/> | <input type="checkbox"/> |
| Hint                                                                                              |                          |                          |                          |                          |
| Based on:                                                                                         |                          |                          |                          |                          |
| Number of medications used                                                                        | <input type="checkbox"/> |                          |                          |                          |
| Excessive drug use                                                                                | <input type="checkbox"/> |                          |                          |                          |
| Unnecessary drug use                                                                              | <input type="checkbox"/> |                          |                          |                          |
| Other                                                                                             | .....                    |                          |                          |                          |
| 2.2 In the definition of polypharmacy, is the frequency of drug use mentioned?                    | <input type="checkbox"/> | <input type="checkbox"/> | <input type="checkbox"/> | <input type="checkbox"/> |
| Hint                                                                                              |                          |                          |                          |                          |
| Continued use:                                                                                    |                          |                          |                          |                          |
| Daily                                                                                             | <input type="checkbox"/> |                          |                          |                          |
| Once a week                                                                                       | <input type="checkbox"/> |                          |                          |                          |
| Every other day                                                                                   | <input type="checkbox"/> |                          |                          |                          |
| Monthly                                                                                           | <input type="checkbox"/> |                          |                          |                          |
| Non-continued use                                                                                 |                          |                          |                          |                          |
| Irregular use                                                                                     | <input type="checkbox"/> |                          |                          |                          |
| Occasional use                                                                                    | <input type="checkbox"/> |                          |                          |                          |
| Other ...                                                                                         |                          |                          |                          |                          |
| 2.3 In the definition of polypharmacy, is medication types and route of administration mentioned? | <input type="checkbox"/> | <input type="checkbox"/> | <input type="checkbox"/> | <input type="checkbox"/> |
| Hint                                                                                              |                          |                          |                          |                          |
| Pill/suppository/syrup/drop/cream/spray/injection/other                                           | <input type="checkbox"/> |                          |                          |                          |
| Oral/topical/injection/inhalation/other                                                           | <input type="checkbox"/> |                          |                          |                          |

|     |                                                                                                                                | Yes                      | N C                      | No                       | NA                       |
|-----|--------------------------------------------------------------------------------------------------------------------------------|--------------------------|--------------------------|--------------------------|--------------------------|
| 2.4 | In the definition of polypharmacy, is drug type mentioned?<br>Hint                                                             | <input type="checkbox"/> | <input type="checkbox"/> | <input type="checkbox"/> | <input type="checkbox"/> |
|     | Chemical/herbal/homemade <input type="checkbox"/>                                                                              |                          |                          |                          |                          |
|     | Prescribed/ non-prescribed/over-the-counter <input type="checkbox"/>                                                           |                          |                          |                          |                          |
|     | Other ...                                                                                                                      |                          |                          |                          |                          |
| 2.5 | Is the method for collecting data concerning subjects' drug profile for the definition of polypharmacy clearly stated?<br>Hint | <input type="checkbox"/> | <input type="checkbox"/> | <input type="checkbox"/> | <input type="checkbox"/> |
|     | Self-declaration of the patient <input type="checkbox"/>                                                                       |                          |                          |                          |                          |
|     | Reviewing patient's prescriptions <input type="checkbox"/>                                                                     |                          |                          |                          |                          |
|     | Checking patient's medicine cabinet <input type="checkbox"/>                                                                   |                          |                          |                          |                          |
|     | Using patient's' hospital records <input type="checkbox"/>                                                                     |                          |                          |                          |                          |
|     | Using electronic databases <input type="checkbox"/>                                                                            |                          |                          |                          |                          |
|     | Other ...                                                                                                                      |                          |                          |                          |                          |
| 2.6 | Is the eligibility of the person examining drug profiles described?                                                            | <input type="checkbox"/> | <input type="checkbox"/> | <input type="checkbox"/> | <input type="checkbox"/> |
| 2.7 | Is the tool used for examining drug profiles clearly described?                                                                | <input type="checkbox"/> | <input type="checkbox"/> | <input type="checkbox"/> | <input type="checkbox"/> |
| 2.8 | Is the reliability and validity of the tool used for examining drug profiles described?                                        | <input type="checkbox"/> | <input type="checkbox"/> | <input type="checkbox"/> | <input type="checkbox"/> |

### 3. If polypharmacy is defined based on number of medications

|     |                                                                                                  | Yes                      | N C                      | No                       | NA                       |
|-----|--------------------------------------------------------------------------------------------------|--------------------------|--------------------------|--------------------------|--------------------------|
| 3.1 | Does it state the criterion for counting medications for the definition of polypharmacy?<br>Hint | <input type="checkbox"/> | <input type="checkbox"/> | <input type="checkbox"/> | <input type="checkbox"/> |
|     | Number of medication items used over a specified time period <input type="checkbox"/>            |                          |                          |                          |                          |
|     | Number of medications used over a specified time period <input type="checkbox"/>                 |                          |                          |                          |                          |
| 3.2 | Is a cut point specified?                                                                        | <input type="checkbox"/> | <input type="checkbox"/> | <input type="checkbox"/> | <input type="checkbox"/> |
| 3.3 | Is there any scientific justification or evidential resource for the mentioned cut point?        | <input type="checkbox"/> | <input type="checkbox"/> | <input type="checkbox"/> | <input type="checkbox"/> |

### 4. If polypharmacy is defined based on excessive or unnecessary use of medications

|     |                                                                                                                     | Yes                      | NC                       | No                       | NA                       |
|-----|---------------------------------------------------------------------------------------------------------------------|--------------------------|--------------------------|--------------------------|--------------------------|
| 4.1 | Does it state how the necessity /lack of necessity of drug use is assessed?                                         | <input type="checkbox"/> | <input type="checkbox"/> | <input type="checkbox"/> | <input type="checkbox"/> |
|     | Does it state how patient condition is evaluated to assess the necessity /lack of necessity of drug use?            | <input type="checkbox"/> | <input type="checkbox"/> | <input type="checkbox"/> | <input type="checkbox"/> |
|     | Hint                                                                                                                |                          |                          |                          |                          |
|     | History <input type="checkbox"/>                                                                                    |                          |                          |                          |                          |
|     | Full evaluation (history, physical exam, workup results) <input type="checkbox"/>                                   |                          |                          |                          |                          |
|     | Medical records and charts <input type="checkbox"/>                                                                 |                          |                          |                          |                          |
| 4.2 | Does it describe the eligibility criteria of the person examining patient condition?                                | <input type="checkbox"/> | <input type="checkbox"/> | <input type="checkbox"/> | <input type="checkbox"/> |
| 4.3 | In assessing the necessity /lack of necessity of drug use, is a particular tool used to evaluate patient condition? | <input type="checkbox"/> | <input type="checkbox"/> | <input type="checkbox"/> | <input type="checkbox"/> |
| 4.4 | Is the reliability and validity of the tools described?                                                             | <input type="checkbox"/> | <input type="checkbox"/> | <input type="checkbox"/> | <input type="checkbox"/> |
| 4.5 | Is "excessive medication" clearly defined?                                                                          | <input type="checkbox"/> | <input type="checkbox"/> | <input type="checkbox"/> | <input type="checkbox"/> |
|     | Hint                                                                                                                |                          |                          |                          |                          |
|     | Dosage higher than essential at each time use <input type="checkbox"/>                                              |                          |                          |                          |                          |
|     | Frequency of use higher than essential <input type="checkbox"/>                                                     |                          |                          |                          |                          |
|     | Extra items in each regimen <input type="checkbox"/>                                                                |                          |                          |                          |                          |
|     | Using PIM <input type="checkbox"/>                                                                                  |                          |                          |                          |                          |
|     | Drug-drug interactions <input type="checkbox"/>                                                                     |                          |                          |                          |                          |
|     | Drug-disease interactions <input type="checkbox"/>                                                                  |                          |                          |                          |                          |
|     | Duplications <input type="checkbox"/>                                                                               |                          |                          |                          |                          |
|     | Same class <input type="checkbox"/>                                                                                 |                          |                          |                          |                          |
|     | Other...                                                                                                            |                          |                          |                          |                          |
| 4.5 | Is a particular tool used to evaluate excessive drug use?                                                           | <input type="checkbox"/> | <input type="checkbox"/> | <input type="checkbox"/> | <input type="checkbox"/> |

\*NC: not clear

\*\*NA: not applicable
